# Supplementary material
Source: Springer Nature journal article supplement (https://www.springermedizin.de/resource/supplementary/12885_2012_3447_MOESM1_ESM.pdf/9463674)
Supplement: MOESM1 [file 9463674]

G T T **T** T C T G A A C

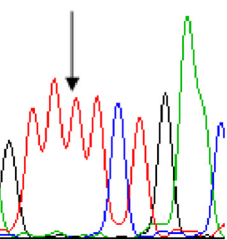

nt -443 TT

320 330  
C G T T T T T G G T T T T T T T T T G

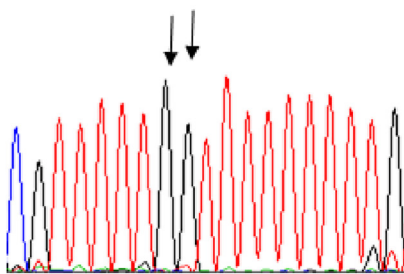

nt -156GG/GG

G T T **T** T C T G A A C

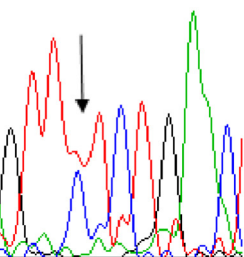

nt -443 CT

320 330  
C G T T T T T G **G** T T T T T T T T T G

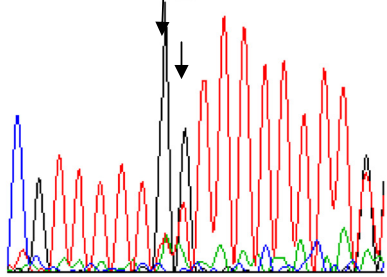

nt -156GG/G

G T T **C** T C T G A A C

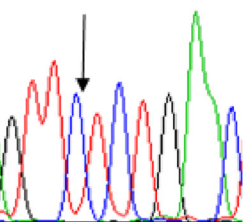

nt -443CC

320 330  
C G T T T T T **G** T T T T T T T T T G

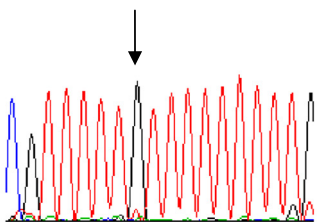

nt -156G/G

420

A T C T C **T** C C G C C T C C C

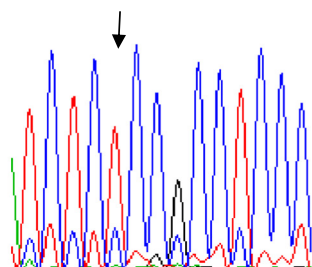

-66 TT
